# Supplementary material
Source: publisher site journal article supplement (https://www.dovepress.com/article/443130)
Supplement: Supplementary file 1 [file get_supplementary_file.php]

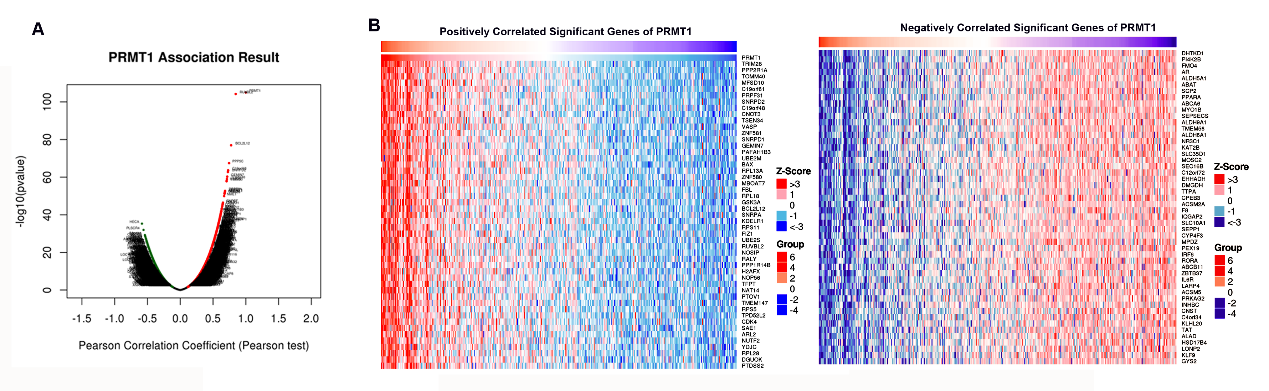


**Figure S1 Differentially expressed genes associated with PRMT1 expression in LIHC.** (A) Volcano plot of differentially expressed gene profiles of genes co-expressed with PRMT1. (B) Expression heatmap of the top 50 PRMT1-related genes.
